# Supplementary material for: Valuable Clues for DCNN-Based Landslide Detection from a Comparative Assessment in the Wenchuan Earthquake Area
Source: MDPI journal article supplement (doi:10.3390/s21155191), 2021-07-31
Supplement: s1 [file s1]

**Table S1.** Confusion matrix of tests with S10000 in the target area\*

|    | VGG16 | VGG19 | ResNet50 | ResNet101 | DenseNet120 | DenseNet201 | UNet- | UNet+ | ResUNet |
|----|-------|-------|----------|-----------|-------------|-------------|-------|-------|---------|
| TP | 151   | 139   | 151      | 170       | 161         | 163         | 92    | 264   | 242     |
| FP | 16    | 17    | 30       | 27        | 36          | 27          | 57    | 73    | 62      |
| TN | 655   | 654   | 640      | 644       | 635         | 644         | 713   | 452   | 487     |
| FN | 48    | 59    | 48       | 30        | 38          | 37          | 8     | 81    | 79      |

\*All landslide and non-landslide samples in the target area are involved. The number of latter is much more than that of the former.

**Table S2.** Confusion matrix of tests with S1000 in the target area

|    | VGG16 | VGG19 | ResNet50 | ResNet101 | DenseNet120 | DenseNet201 | UNet- | UNet+ | ResUNet |
|----|-------|-------|----------|-----------|-------------|-------------|-------|-------|---------|
| TP | 156   | 128   | 159      | 164       | 141         | 145         | 323   | 259   | 218     |
| FP | 14    | 15    | 43       | 37        | 28          | 19          | 118   | 64    | 42      |
| TN | 657   | 656   | 629      | 633       | 643         | 652         | 396   | 497   | 496     |
| FN | 64    | 71    | 39       | 35        | 58          | 54          | 33    | 50    | 115     |

**Table S3.** Confusion matrix of tests with S100 in the target area

|    | VGG16 | VGG19 | ResNet50 | ResNet101 | DenseNet120 | DenseNet201 | UNet- | UNet+ | ResUNet |
|----|-------|-------|----------|-----------|-------------|-------------|-------|-------|---------|
| TP | 170   | 125   | 171      | 168       | 168         | 155         | 326   | 164   | 249     |
| FP | 28    | 17    | 59       | 61        | 70          | 37          | 117   | 64    | 82      |
| TN | 643   | 653   | 612      | 610       | 601         | 634         | 401   | 517   | 441     |
| FN | 51    | 74    | 29       | 31        | 31          | 44          | 26    | 126   | 98      |

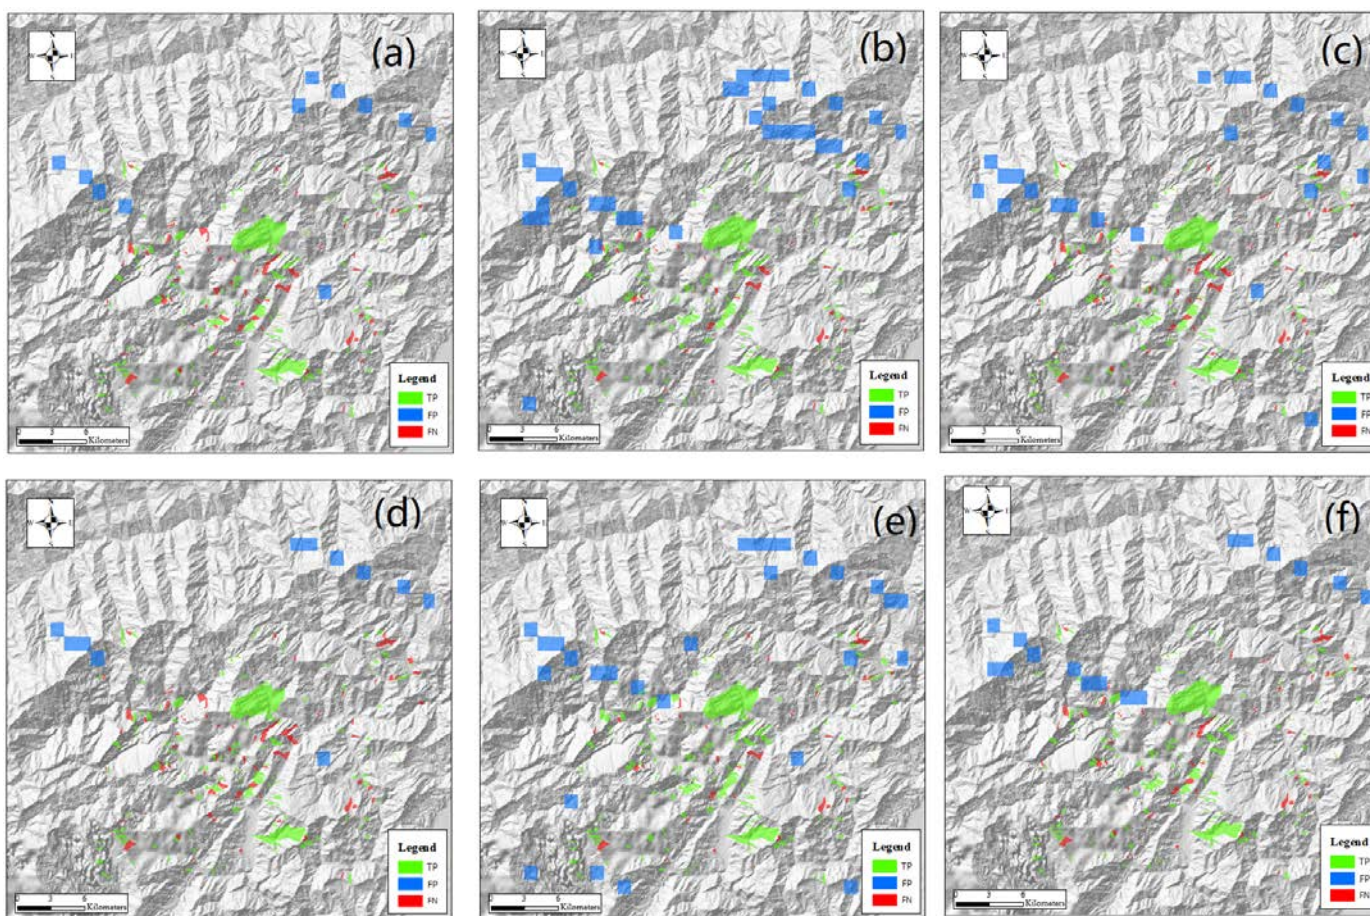

**Figure S1.** Detection results of scene-based models with sample set S1000 around the Daguangbao landslide. (a) VGG16; (b) ResNet50; (c) DenseNet120; (d) VGG19; (e) ResNet101; (f) DenseNet201.



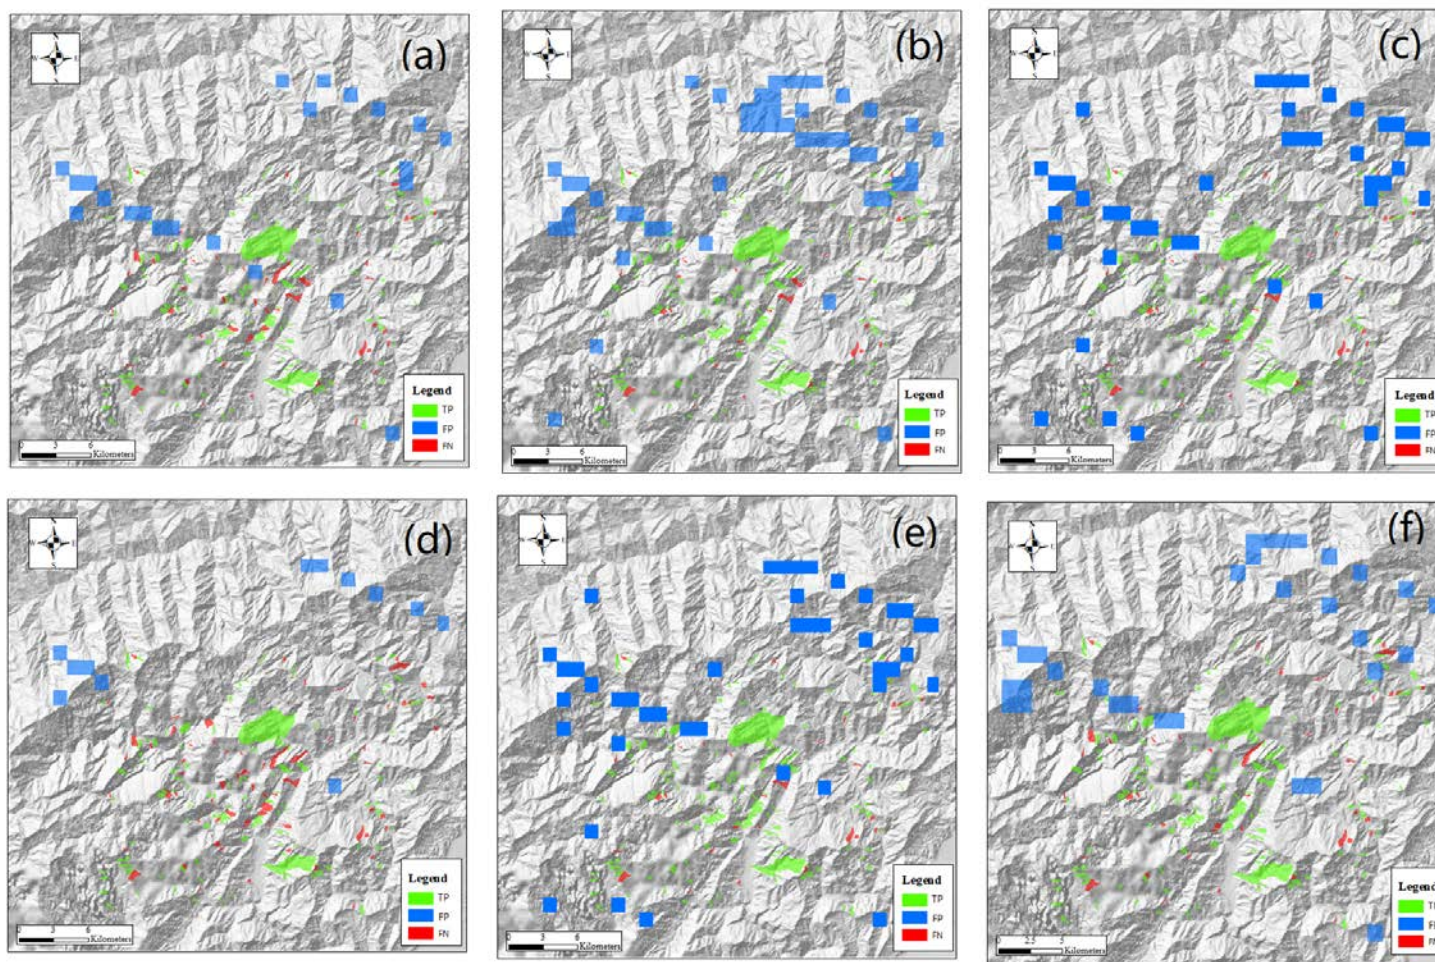

**Figure S2.** Detection results of scene-based models with sample set S100 around the Daguangbao landslide. (a) VGG16; (b) ResNet50; (c) DenseNet120; (d) VGG19; (e) ResNet101; (f) DenseNet201.

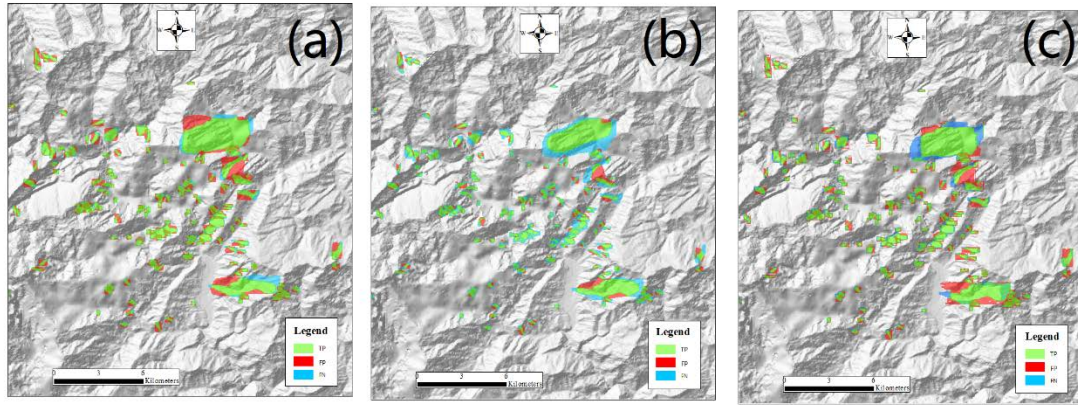

**Figure S3.** Detection results of U-Net models with sample set S1000 around the Daguangbao landslide.

(a) UNet-; (b) UNet+; (c) ResUNet.

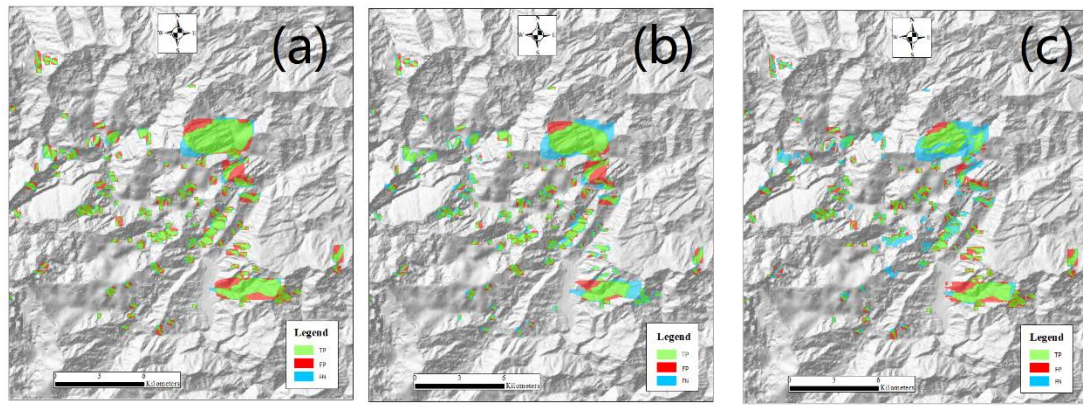

**Figure S4.** Detection results of U-Net models with sample set S100 around the Daguangbao landslide. (a)

UNet-; (b) UNet+; (c) ResUNet.

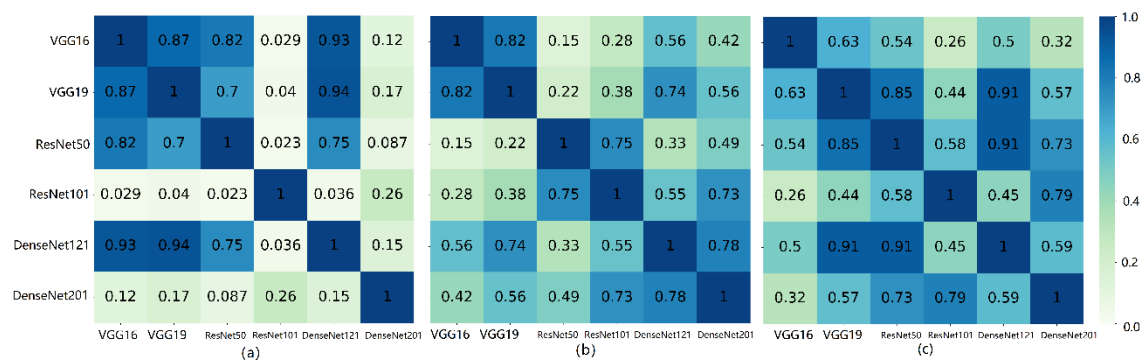

**Figure S5.** Statistical significance test of scene-oriented models. (a) test with 100 samples; (b) test with 1000 samples; (c) test with 10,000 samples. The data in cells is the p-value of F-test.

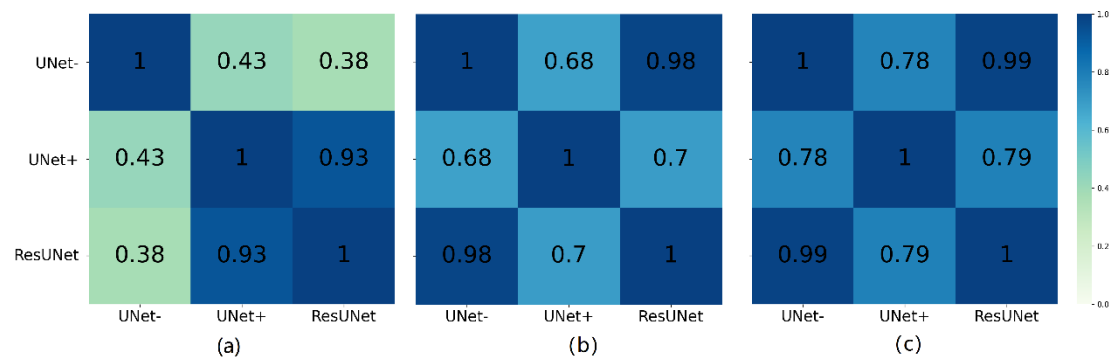

**Figure S6.** Statistical significance test of UNet models. (a) test with 100 samples; (b) test with 1000 samples; (c) test with 10,000 samples. The data in cells is the p-value of F-test.

## Open access resources

The landslide inventories

<https://www.sciencebase.gov/catalog/item/583f4114e4b04fc80e3c4a1a>

the image website

<http://www.gscloud.cn/sources/index?pid=2&rootid=2>
